# Supplementary material
Source: Springer Nature journal article supplement (https://www.springermedizin.de/resource/supplementary/12884_2011_415_MOESM2_ESM.pdf/9457660)
Supplement: MOESM2 [file 9457660]

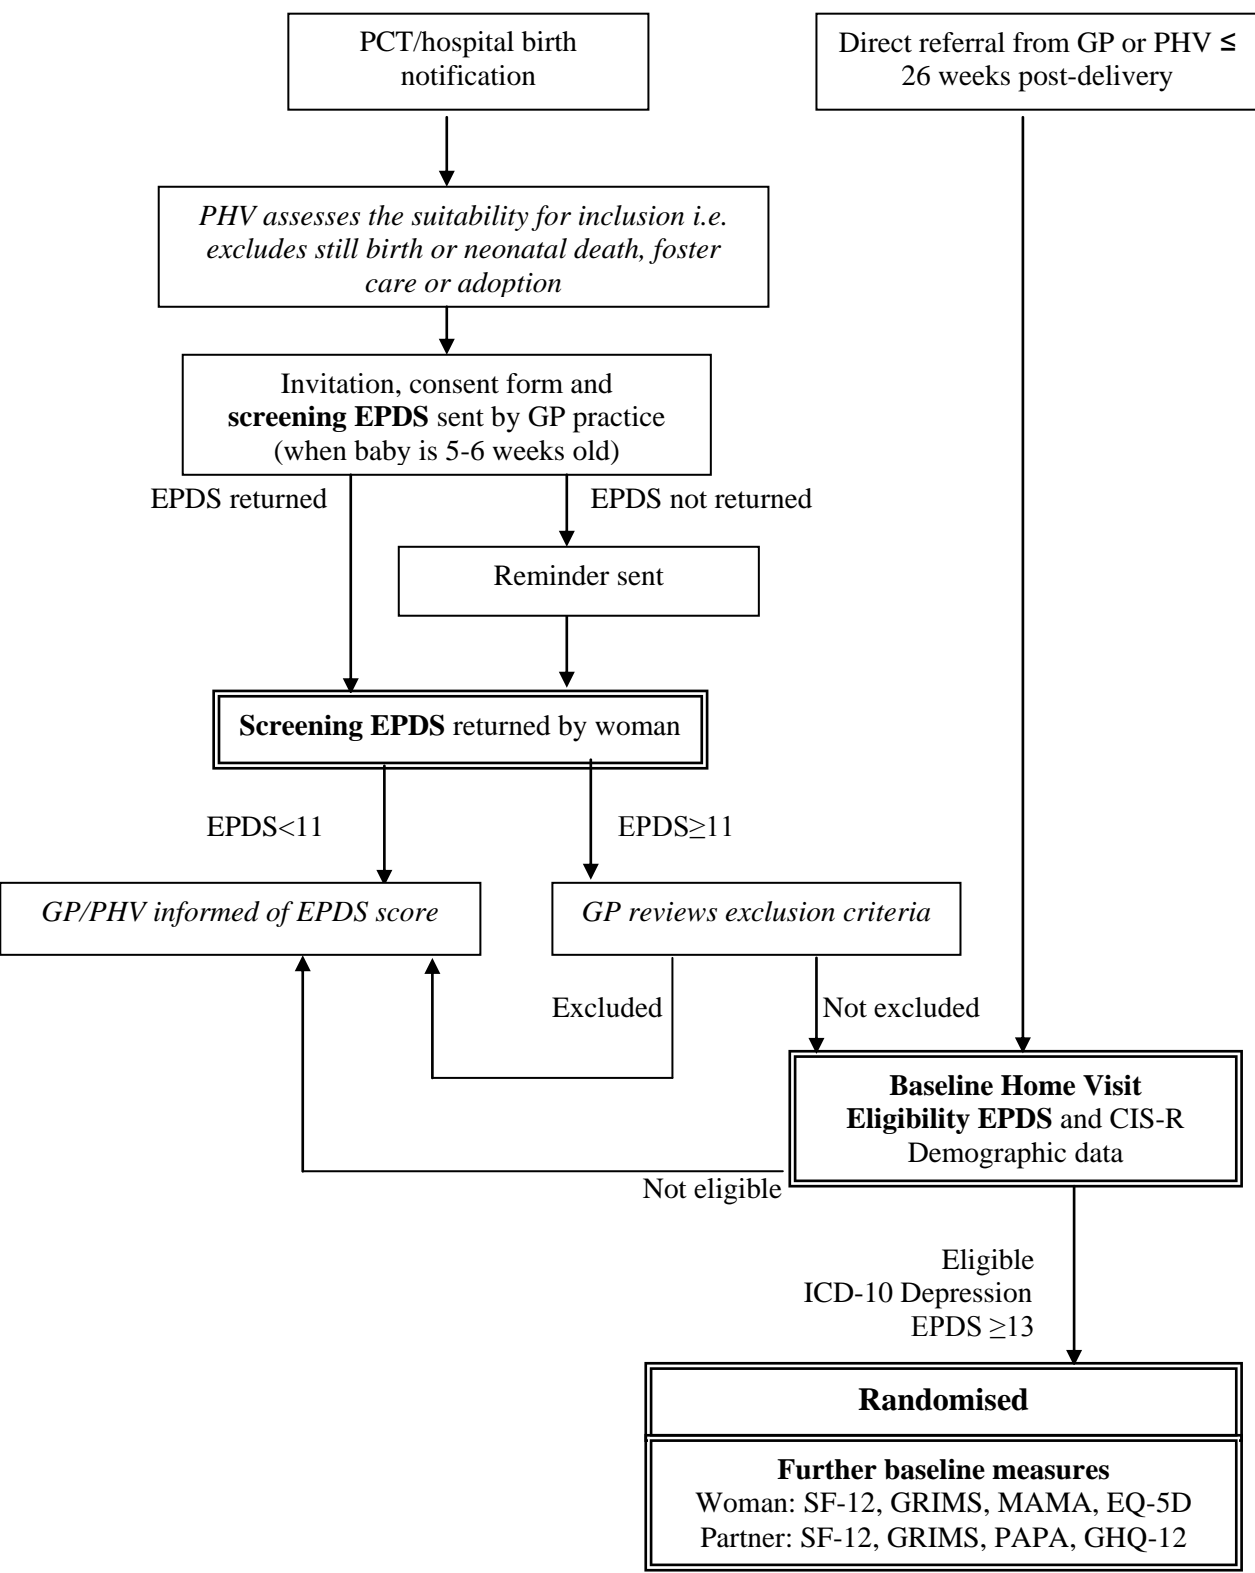

**Note:** If suicide ideation was reported at any stage in this process the self-harm protocol was implemented (Appendix 1)
